# Supplementary material for: High-sensitivity troponin I is associated with cardiovascular outcomes but not with breast arterial calcification among postmenopausal women
Source: PubMed Central journal article supplement (PMC9789357; doi:10.1016/j.ijcrp.2022.200157), 2022-11-01
Supplement: mmc1.pdf [file mmc1.pdf]

+ hsTnl < 4   
 + hsTnl 4–10   
 + hsTnl > 10

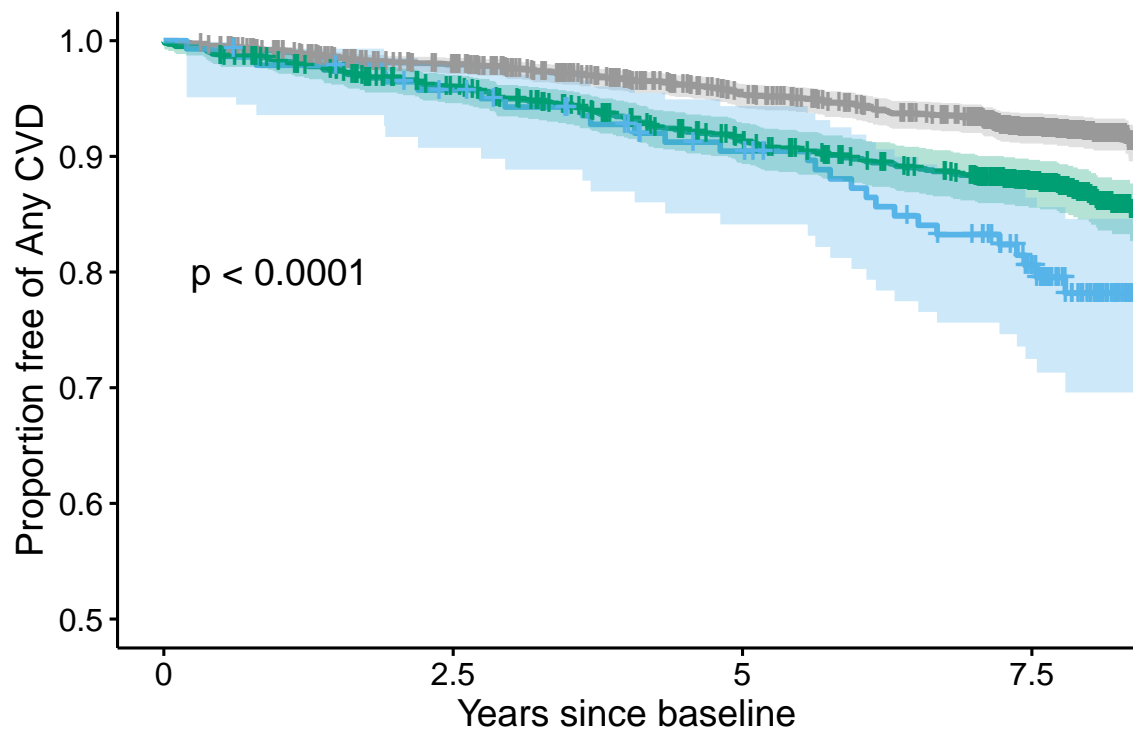

Number at risk

|      |      |      |      |
|------|------|------|------|
| 1715 | 1616 | 1474 | 1186 |
| 1039 | 958  | 869  | 706  |
| 142  | 132  | 116  | 83   |

+ hsTnl < 4   
 + hsTnl 4–10   
 + hsTnl > 10

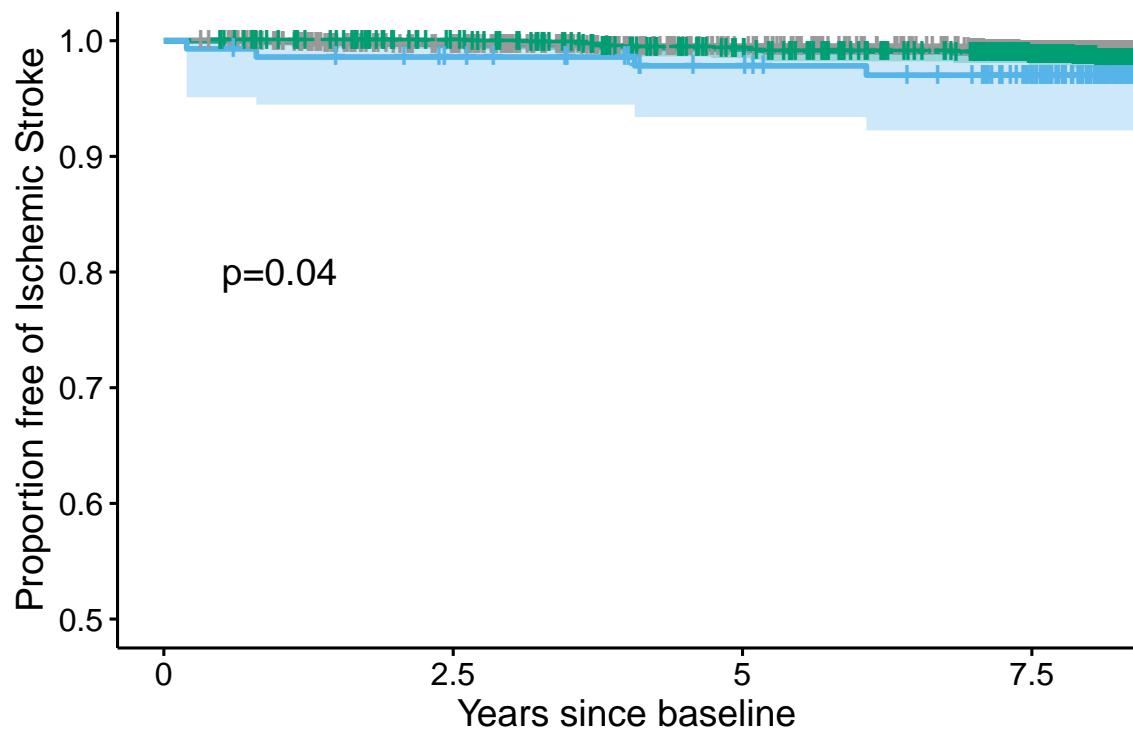

Number at risk

|      |      |      |      |
|------|------|------|------|
| 1715 | 1643 | 1534 | 1261 |
| 1039 | 998  | 938  | 786  |
| 142  | 135  | 125  | 99   |

+ hsTnl < 4   
 + hsTnl 4–10   
 + hsTnl > 10

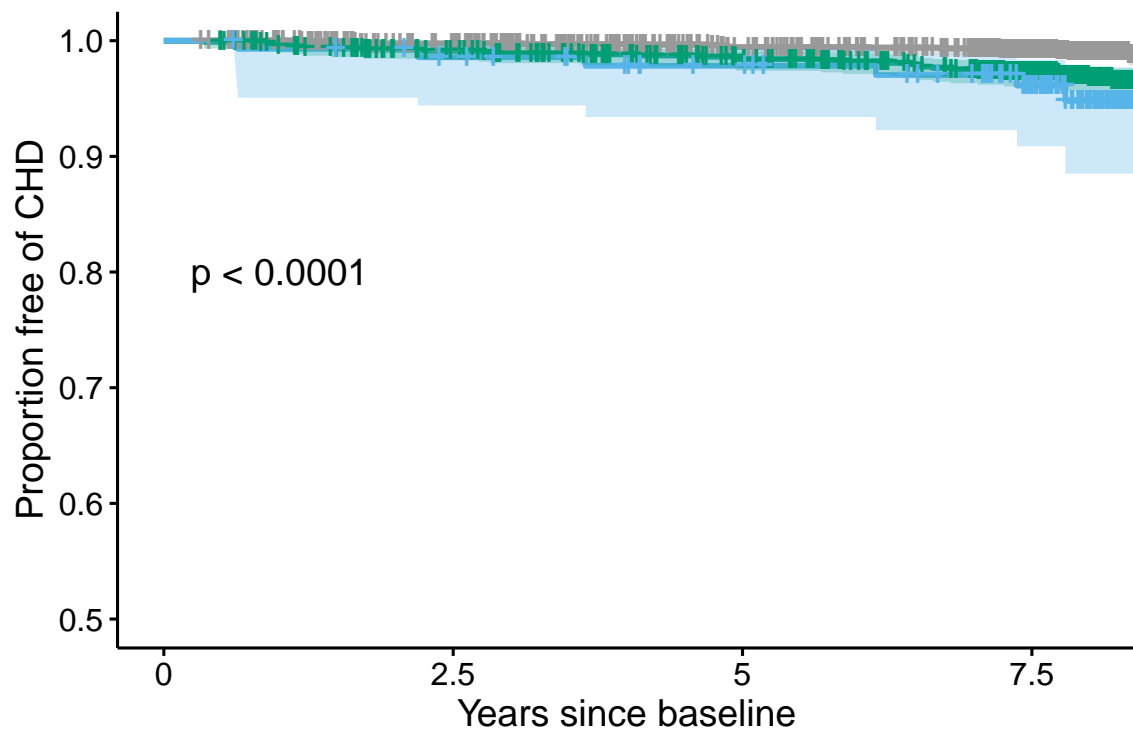

Number at risk

|      |      |      |      |
|------|------|------|------|
| 1715 | 1646 | 1533 | 1259 |
| 1039 | 990  | 931  | 773  |
| 142  | 136  | 126  | 99   |

+ hsTnl < 4   
 + hsTnl 4–10   
 + hsTnl > 10

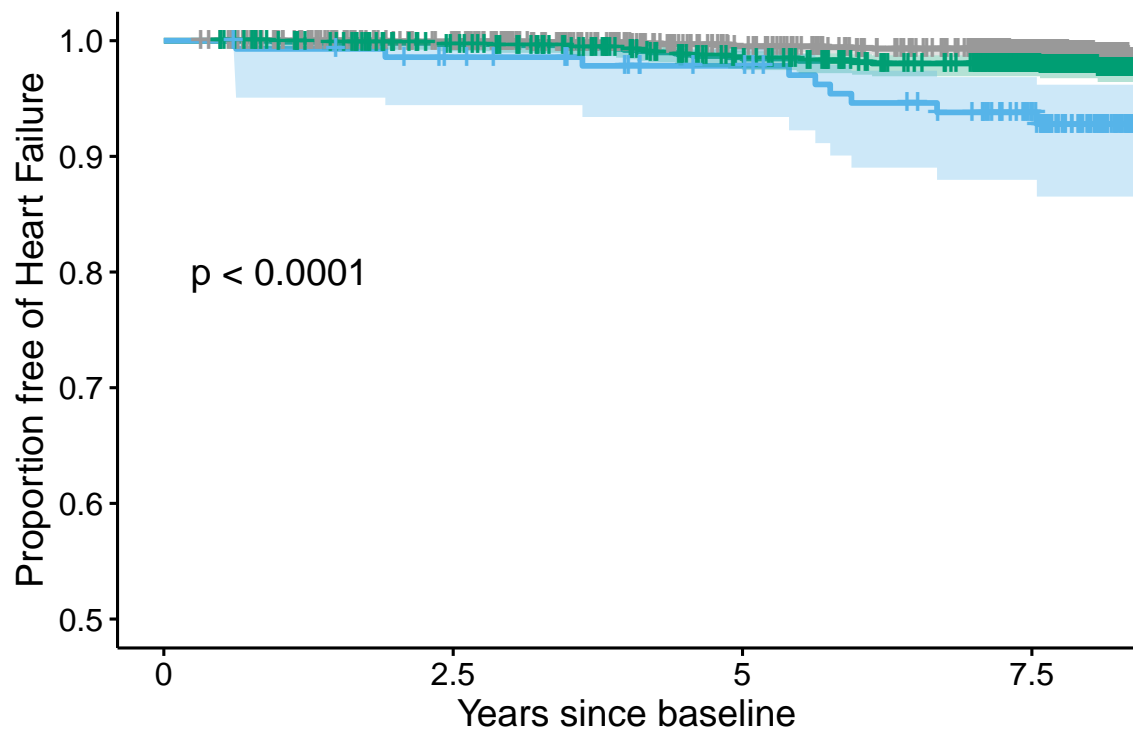

Number at risk

|      |      |      |      |
|------|------|------|------|
| 1715 | 1648 | 1533 | 1262 |
| 1039 | 995  | 930  | 779  |
| 142  | 135  | 125  | 95   |
